# Supplementary material
Source: MDPI journal article supplement (https://www.mdpi.com/2297-8739/9/12/420)
Supplement: s1 [file s1]

# Medium- and High-Pressure Integrated Chromatographic Strategies for the Isolation and Purification of Free Radical Inhibitors from *Dracocephalum heterophyllum*

Yue Lv <sup>1,2</sup>, Ze Wang <sup>3</sup>, Qilan Wang <sup>1</sup> and Jun Dang <sup>1,\*</sup>

<sup>1</sup> Qinghai Provincial Key Laboratory of Tibetan Medicine Research, Key Laboratory of Tibetan Medicine Research, Northwest Institute of Plateau Biology, Chinese Academy of Sciences, Xining 810001, China

<sup>2</sup> Center for Mitochondria and Healthy Aging, College of Life Sciences, Yantai University, Yantai 264005, China

<sup>3</sup> College of Pharmacy, Qinghai Nationalities University, Xining 810007, China

\* Correspondence: dangjun@nwipb.cas.cn; Tel.: +86-971-6143-282.

## Table of Contents

|                                                                                                                                   |    |
|-----------------------------------------------------------------------------------------------------------------------------------|----|
| Figure S1. High resolution mass spectrum of xanthotoxol (Fr1321) .....                                                            | 3  |
| Figure S2. <sup>1</sup> H NMR Spectrum (600 MHz) of xanthotoxol (Fr1321) (in DMSO- <i>d</i> <sub>6</sub> ).....                   | 4  |
| Figure S3. <sup>13</sup> C NMR Spectrum (151 MHz) of xanthotoxol (Fr1321) (in DMSO- <i>d</i> <sub>6</sub> ).....                  | 5  |
| Figure S4. High resolution mass spectrum of 5-hydroxy-8-methoxypsoralen (Fr1331).....                                             | 6  |
| Figure S5. <sup>1</sup> H NMR Spectrum (600 MHz) of 5-hydroxy-8-methoxypsoralen (Fr1331) (in DMSO- <i>d</i> <sub>6</sub> ) .....  | 7  |
| Figure S6. <sup>13</sup> C NMR Spectrum (151 MHz) of 5-hydroxy-8-methoxypsoralen (Fr1331) (in DMSO- <i>d</i> <sub>6</sub> ) ..... | 8  |
| Figure S7. High resolution mass spectrum of luteolin (Fr13441) .....                                                              | 9  |
| Figure S8. <sup>1</sup> H NMR Spectrum (600 MHz) of luteolin (Fr13441) (in DMSO- <i>d</i> <sub>6</sub> ) .....                    | 10 |
| Figure S9. <sup>13</sup> C NMR Spectrum (151 MHz) of luteolin (Fr13441) (in DMSO- <i>d</i> <sub>6</sub> ) .....                   | 11 |
| Figure S10. High resolution mass spectrum of methyl rosmarinate (Fr13442).....                                                    | 12 |
| Figure S11. <sup>1</sup> H NMR Spectrum (600 MHz) of methyl rosmarinate (Fr13442) (in DMSO- <i>d</i> <sub>6</sub> ) .....         | 13 |
| Figure S12. <sup>13</sup> C NMR Spectrum (151 MHz) of methyl rosmarinate (Fr13442) (in DMSO- <i>d</i> <sub>6</sub> ).....         | 14 |
| Figure S13. High resolution mass spectrum of ethyl rosmarinate (Fr13541).....                                                     | 15 |
| Figure S14. <sup>1</sup> H NMR Spectrum (600 MHz) of ethyl rosmarinate (Fr13541) (in DMSO- <i>d</i> <sub>6</sub> ) .....          | 16 |
| Figure S15. <sup>13</sup> C NMR Spectrum (151 MHz) of ethyl rosmarinate (Fr13541) (in DMSO- <i>d</i> <sub>6</sub> ).....          | 17 |

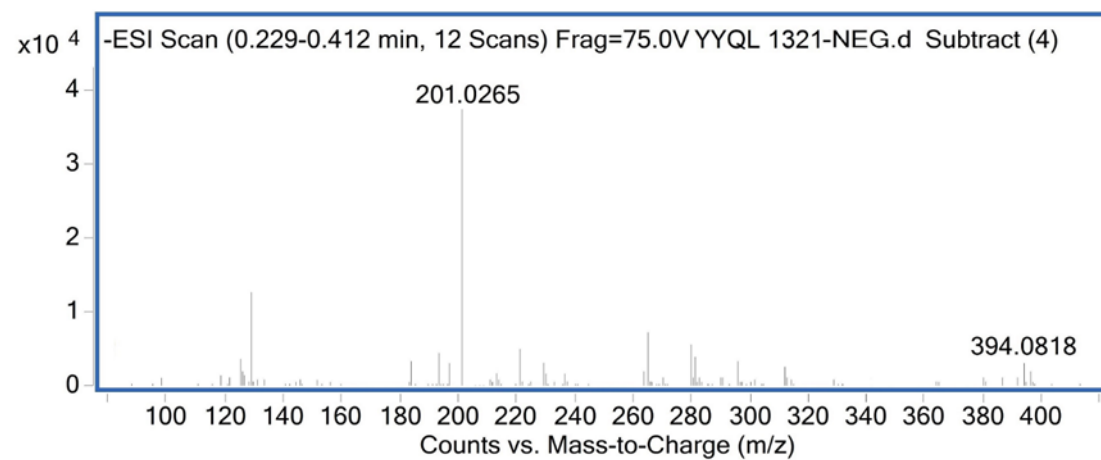

**Figure S1. High resolution mass spectrum of xanthotoxol (Fr1-3-2-1).**

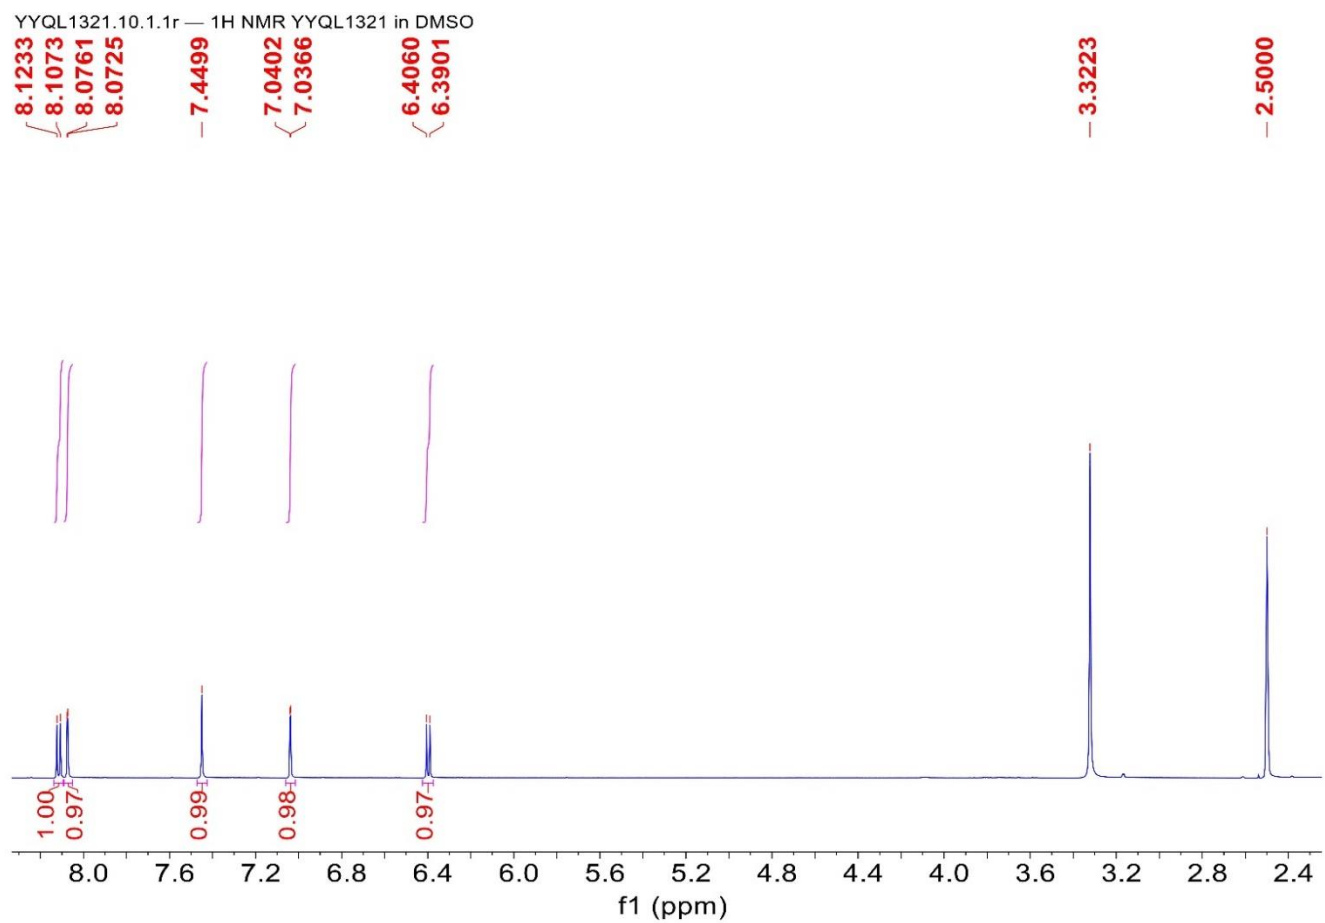

Figure S2. <sup>1</sup>H NMR Spectrum (600 MHz) of xanthotoxol (Fr1-3-2-1) (in DMSO-*d*<sub>6</sub>)

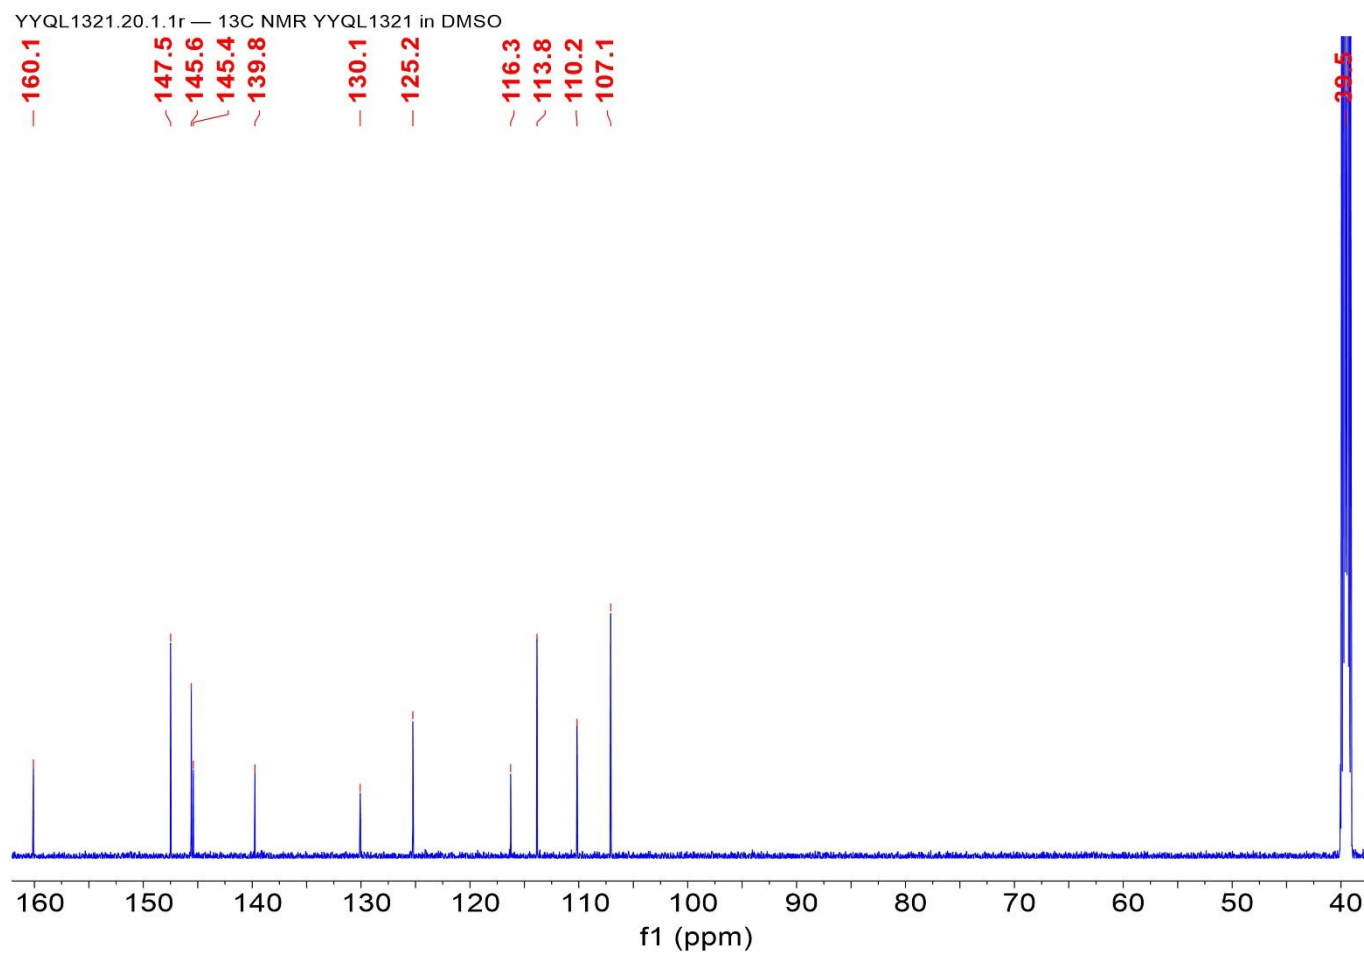

Figure S3.  $^{13}\text{C}$  NMR Spectrum (151 MHz) of xanthotoxol (Fr1-3-2-1) (in  $\text{DMSO-}d_6$ )

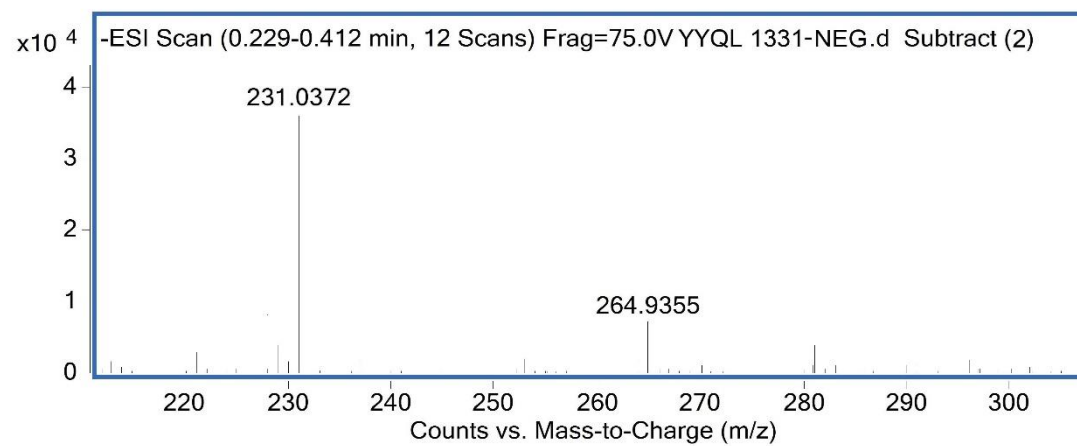

**Figure S4. High resolution mass spectrum of 5-hydroxy-8-methoxypsoralen (Fr1-3-3-1)**

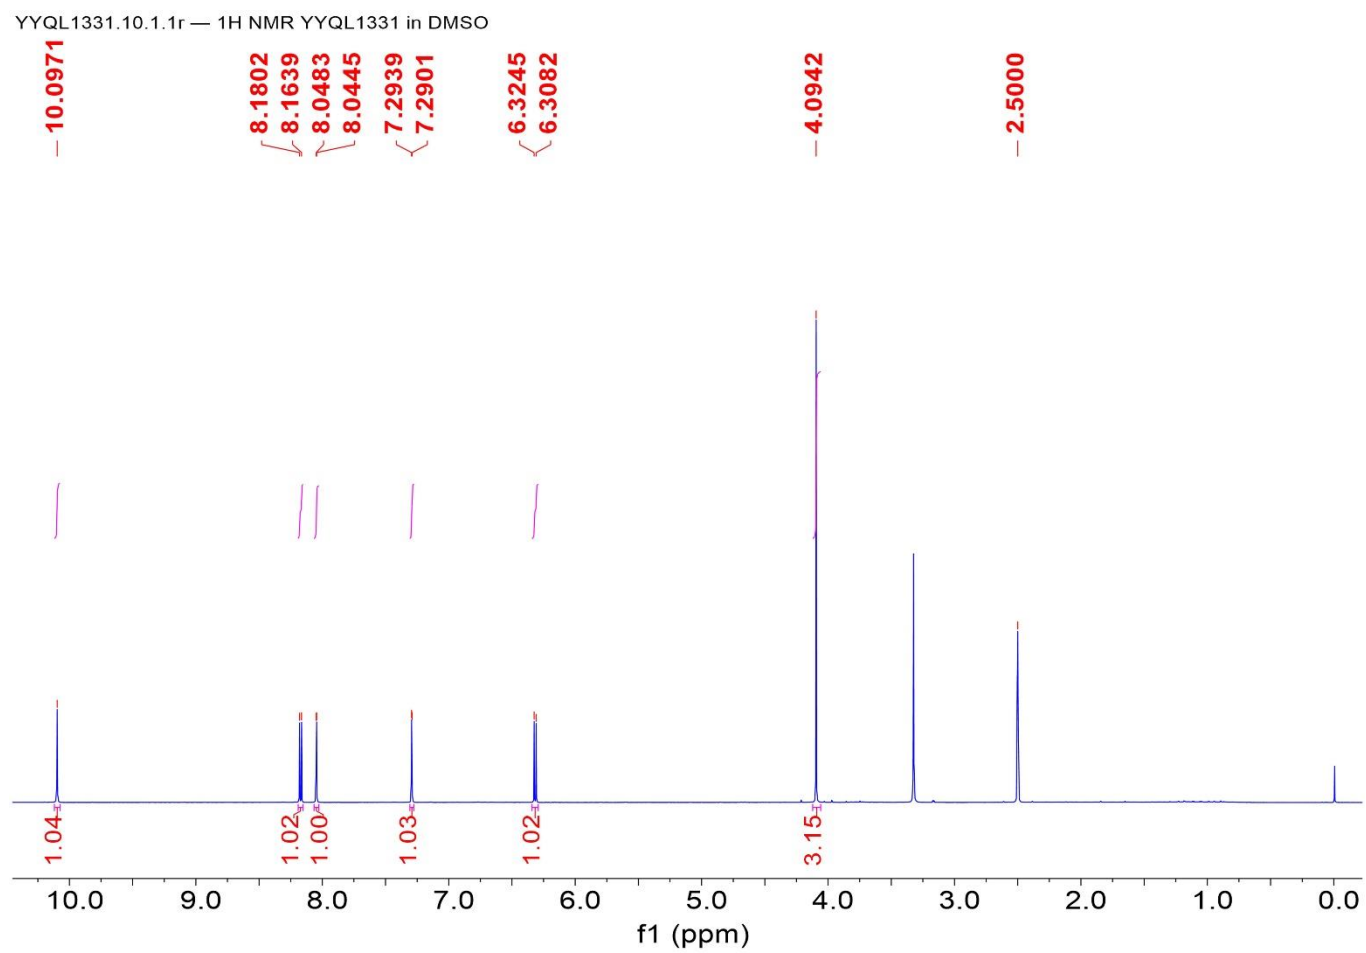

Figure S5. <sup>1</sup>H NMR Spectrum (600 MHz) of 5-hydroxy-8-methoxypsoralen (Fr1-3-3-1) (in DMSO-*d*<sub>6</sub>)

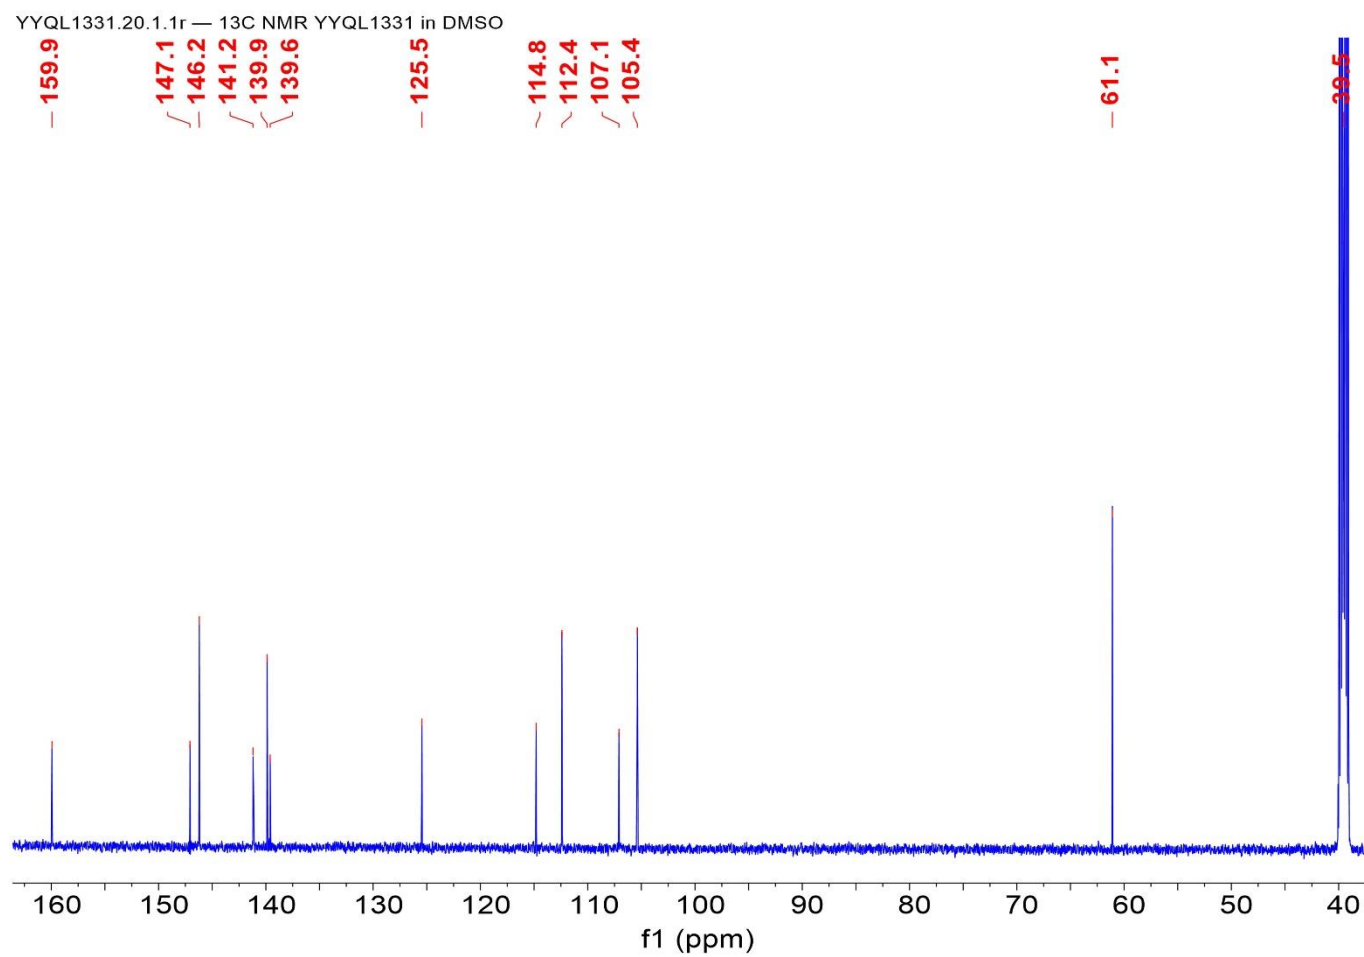

Figure S6.  $^{13}\text{C}$  NMR Spectrum (151 MHz) of 5-hydroxy-8-methoxypsoralen (Fr1-3-3-1) (in  $\text{DMSO-}d_6$ )



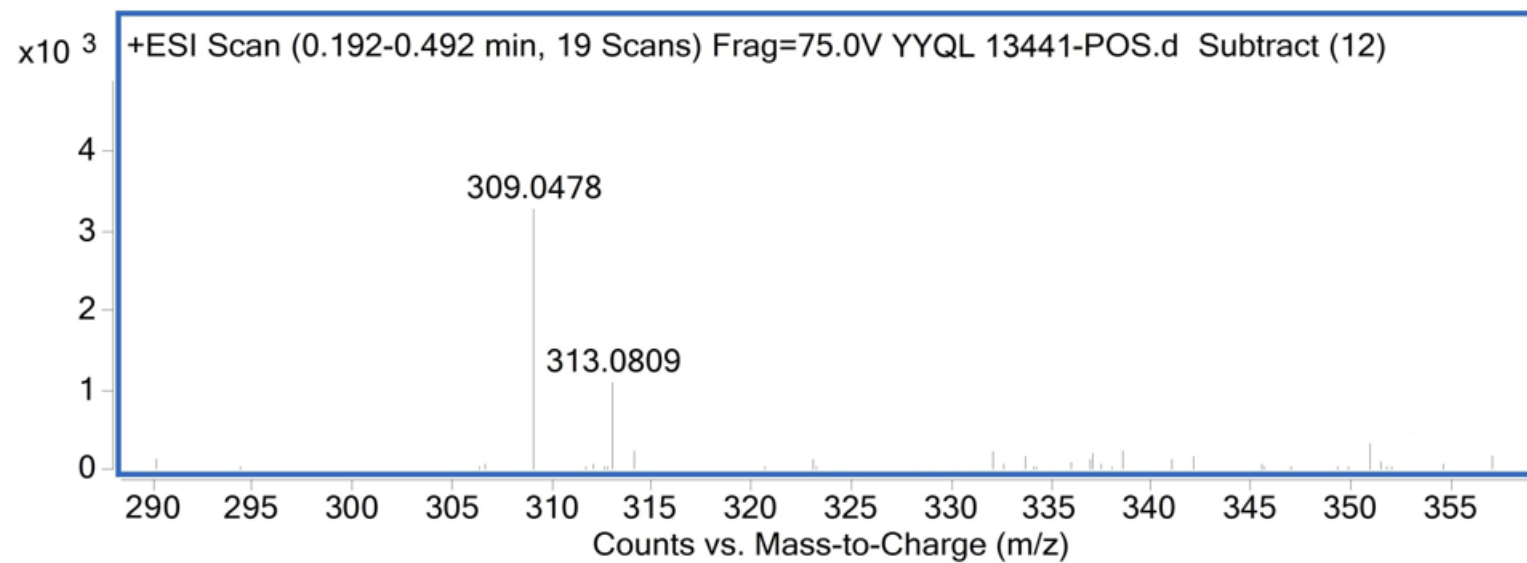

**Figure S7. High resolution mass spectrum of luteolin (Fr1-3-4-4-1)**

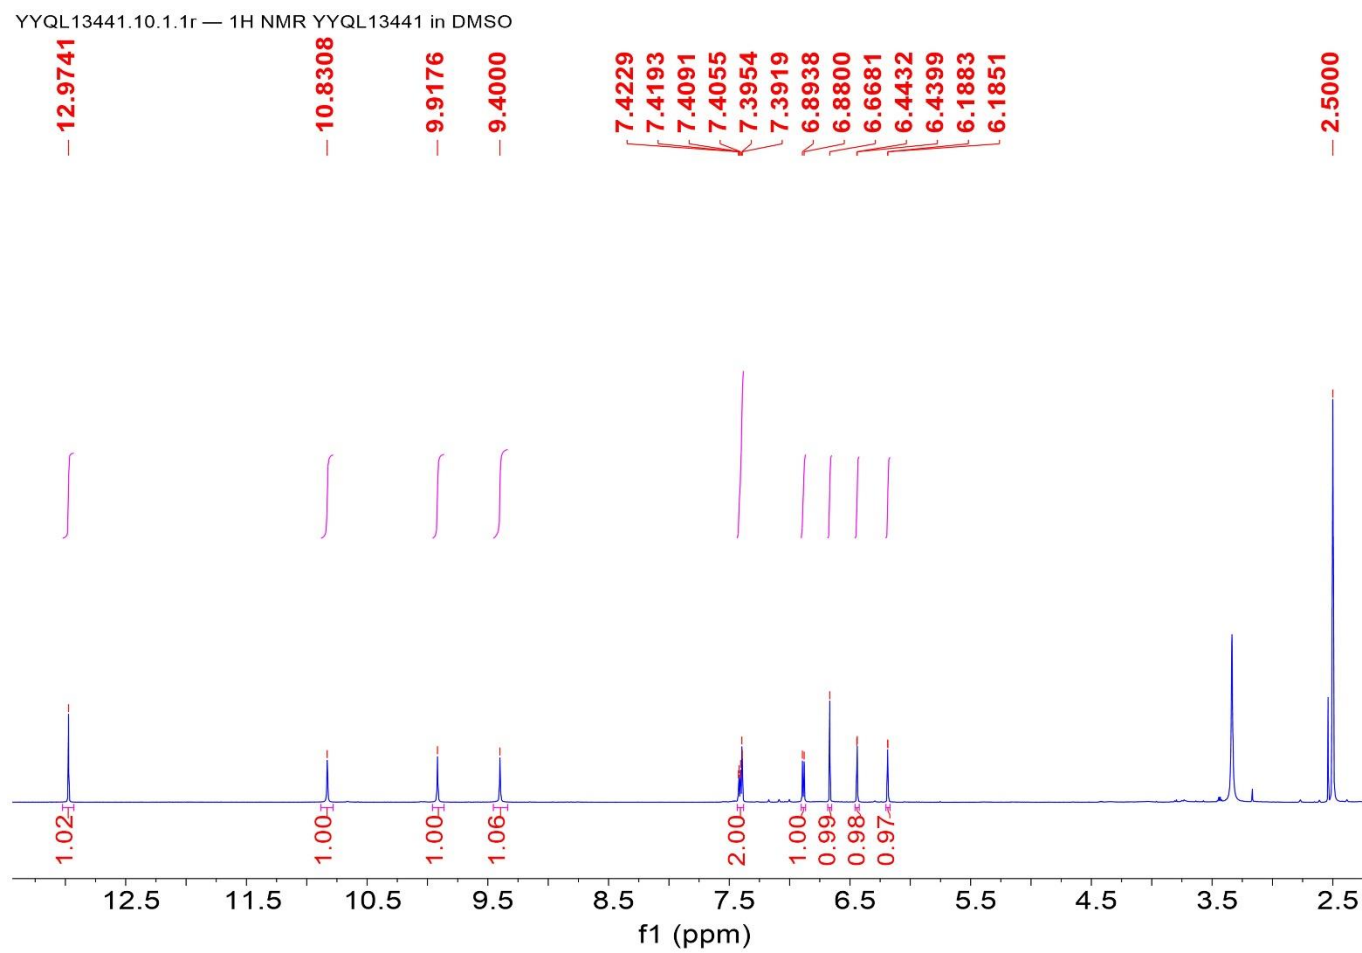

Figure S8.  $^1\text{H}$  NMR Spectrum (600 MHz) of luteolin (Fr1-3-4-4-1) (in  $\text{DMSO}-d_6$ )

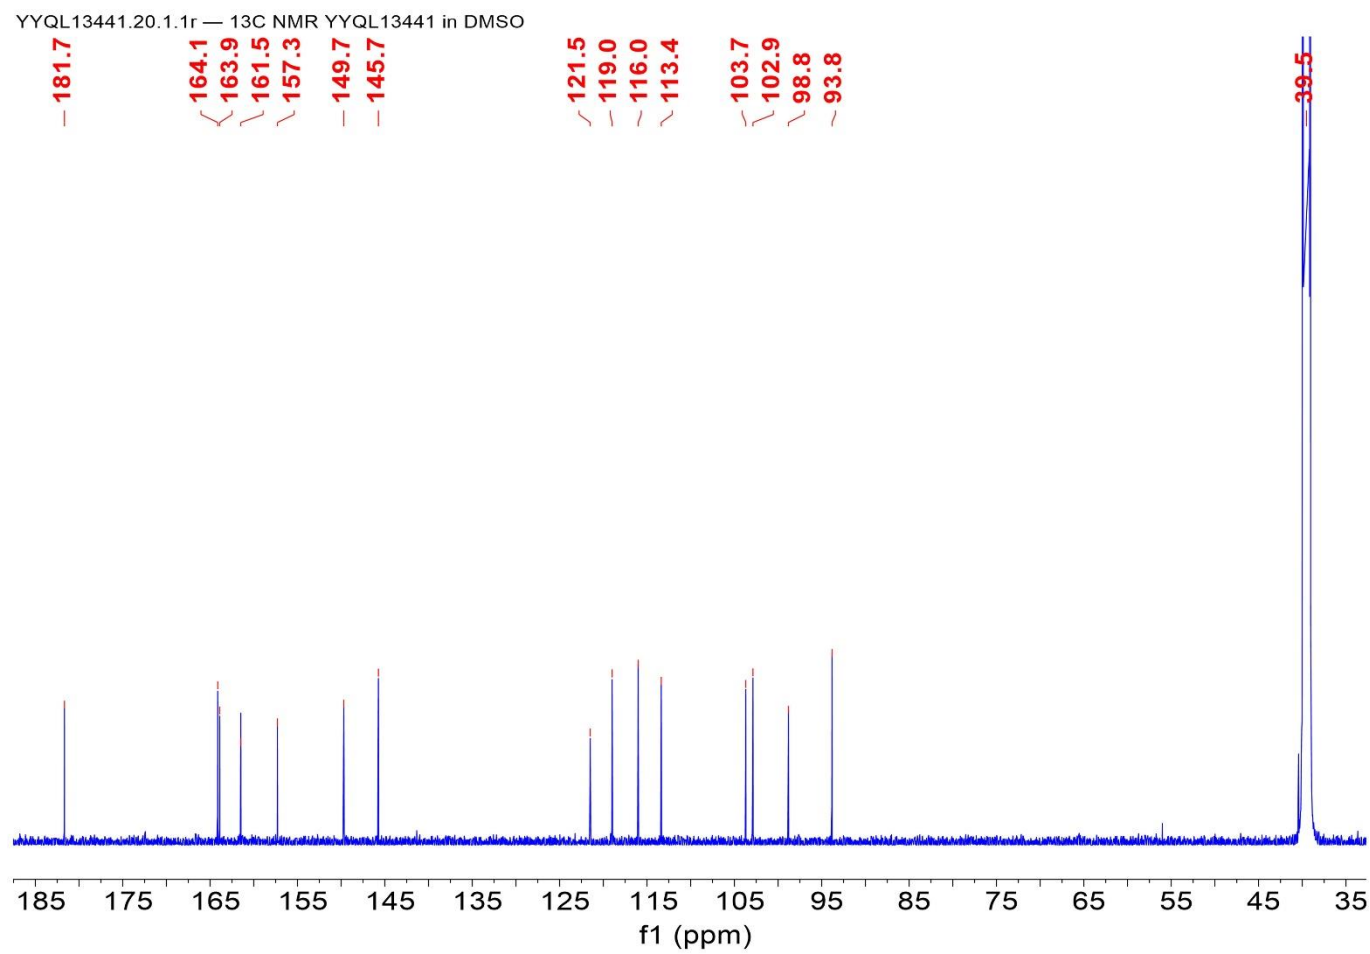

Figure S9.  $^{13}\text{C}$  NMR Spectrum (151 MHz) of luteolin (Fr1-3-4-4-1) (in  $\text{DMSO-}d_6$ )

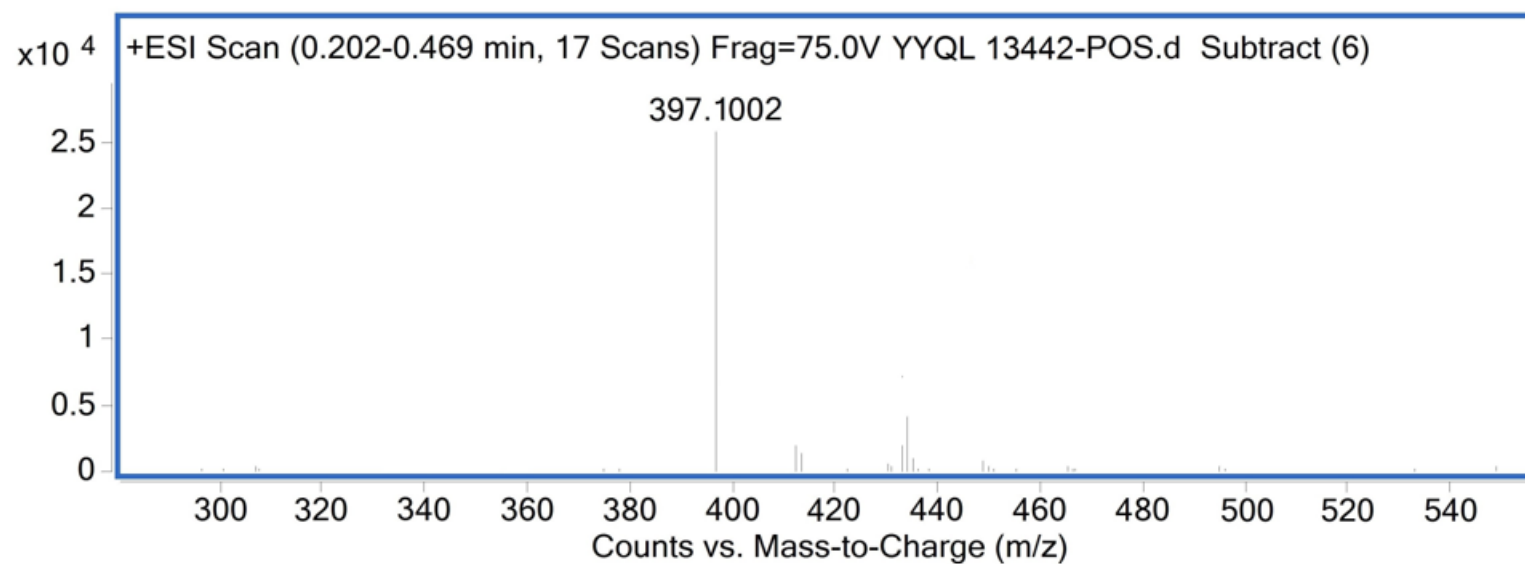

**Figure S10. High resolution mass spectrum of methyl rosmarinate (Fr1-3-4-4-2)**

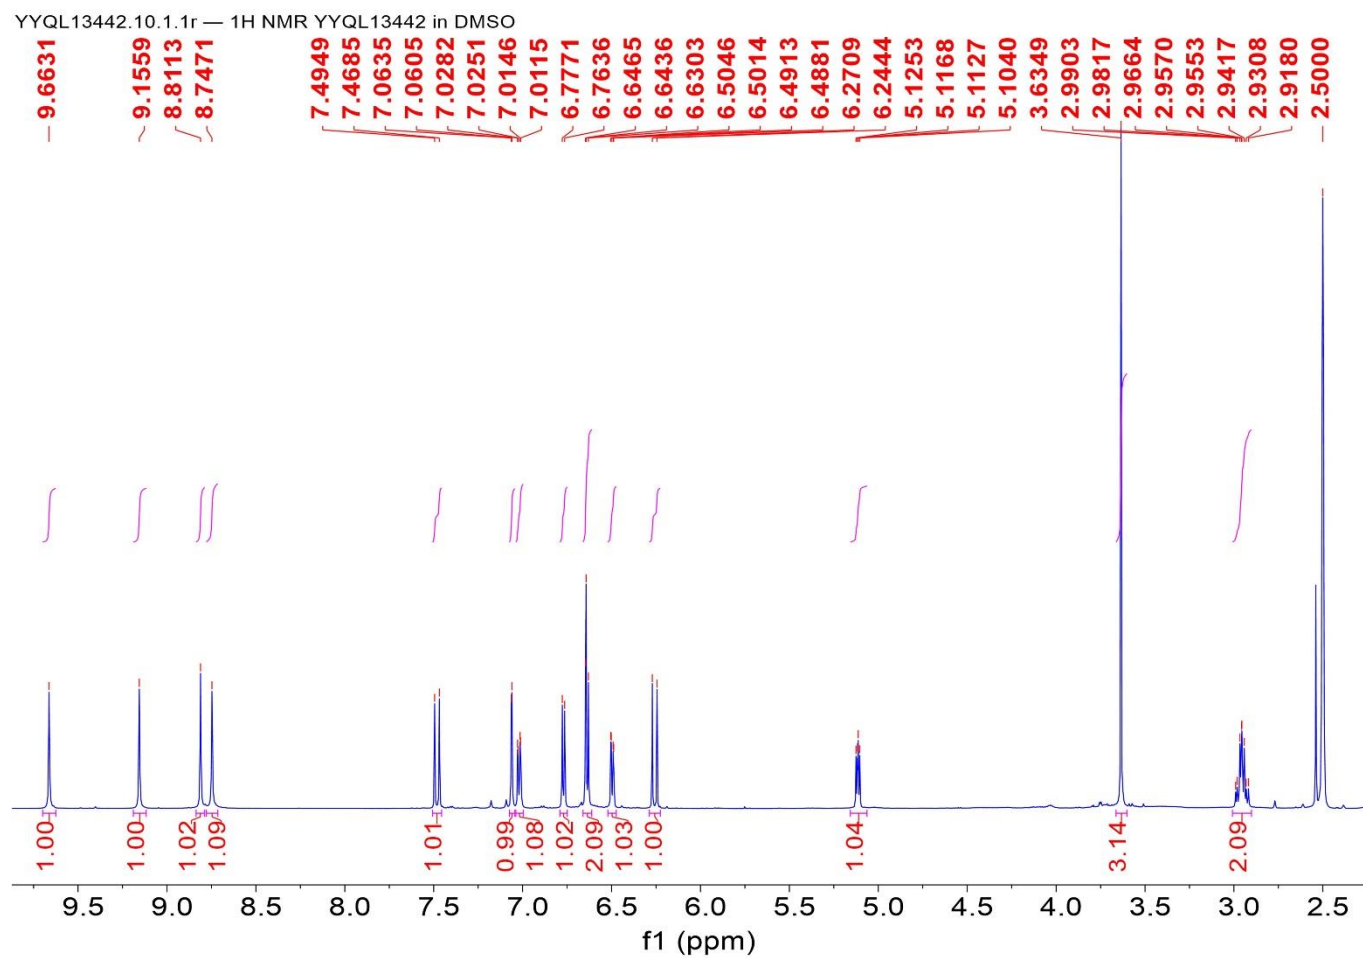

Figure S11.  $^1\text{H}$  NMR Spectrum (600 MHz) of methyl rosmarinate (Fr1-3-4-4-2) (in  $\text{DMSO-}d_6$ )

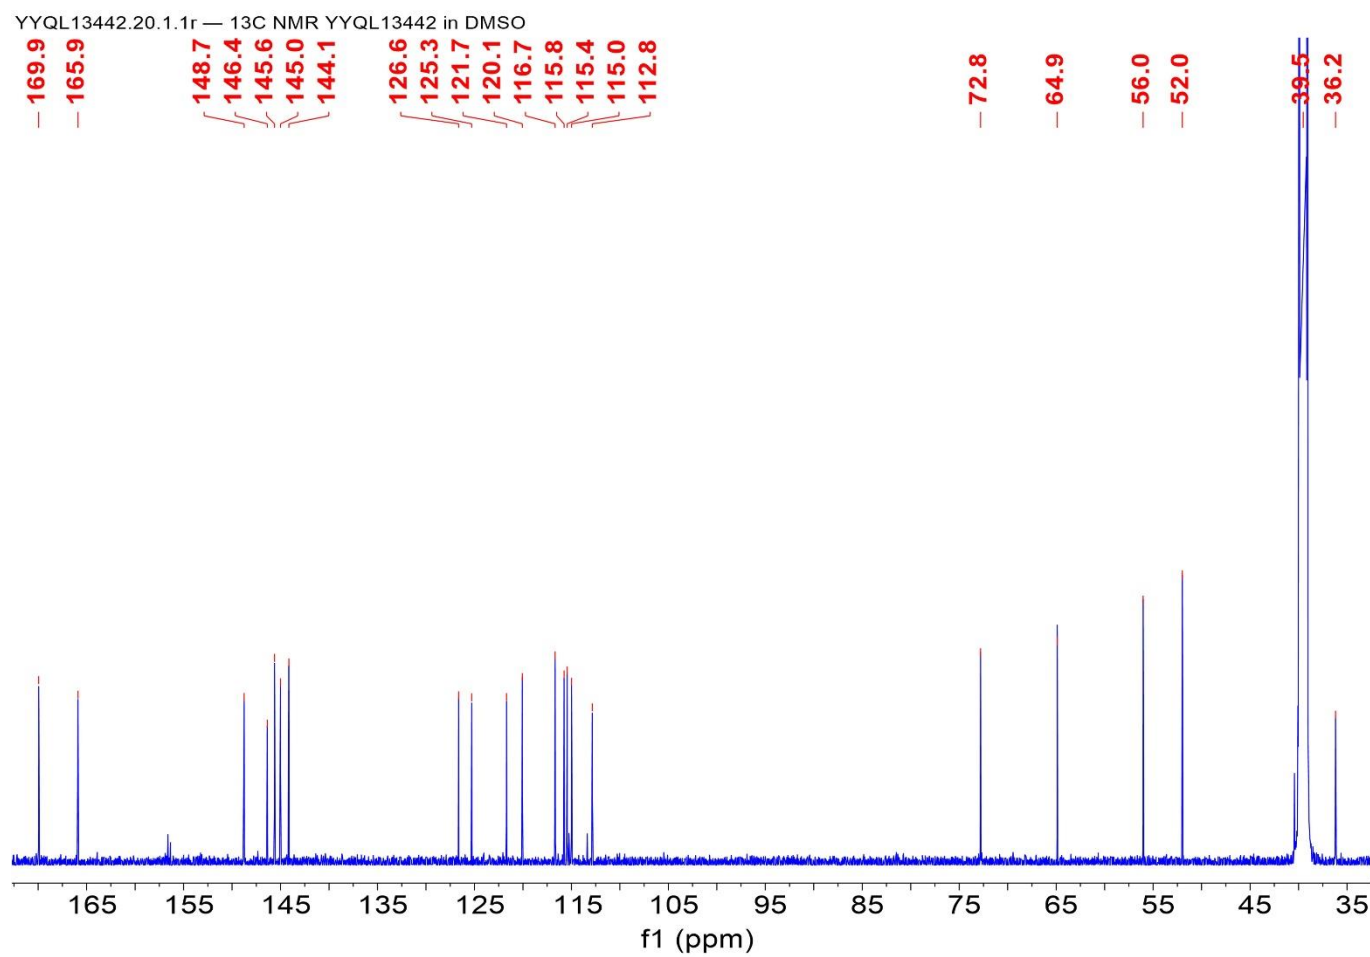

Figure S12. <sup>13</sup>C NMR Spectrum (151 MHz) of methyl rosmarinate (Fr1-3-4-4-2) (in DMSO-*d*<sub>6</sub>)

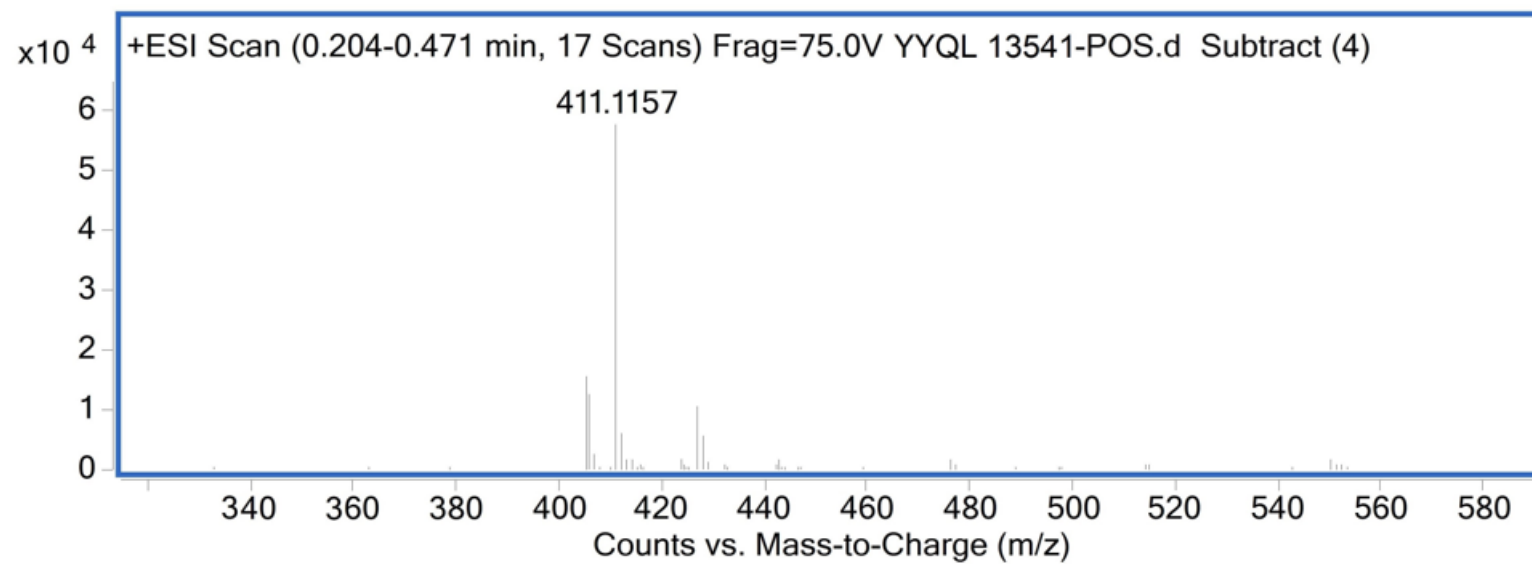

**Figure S13. High resolution mass spectrum of ethyl rosmarinate (Fr1-3-5-4-1)**

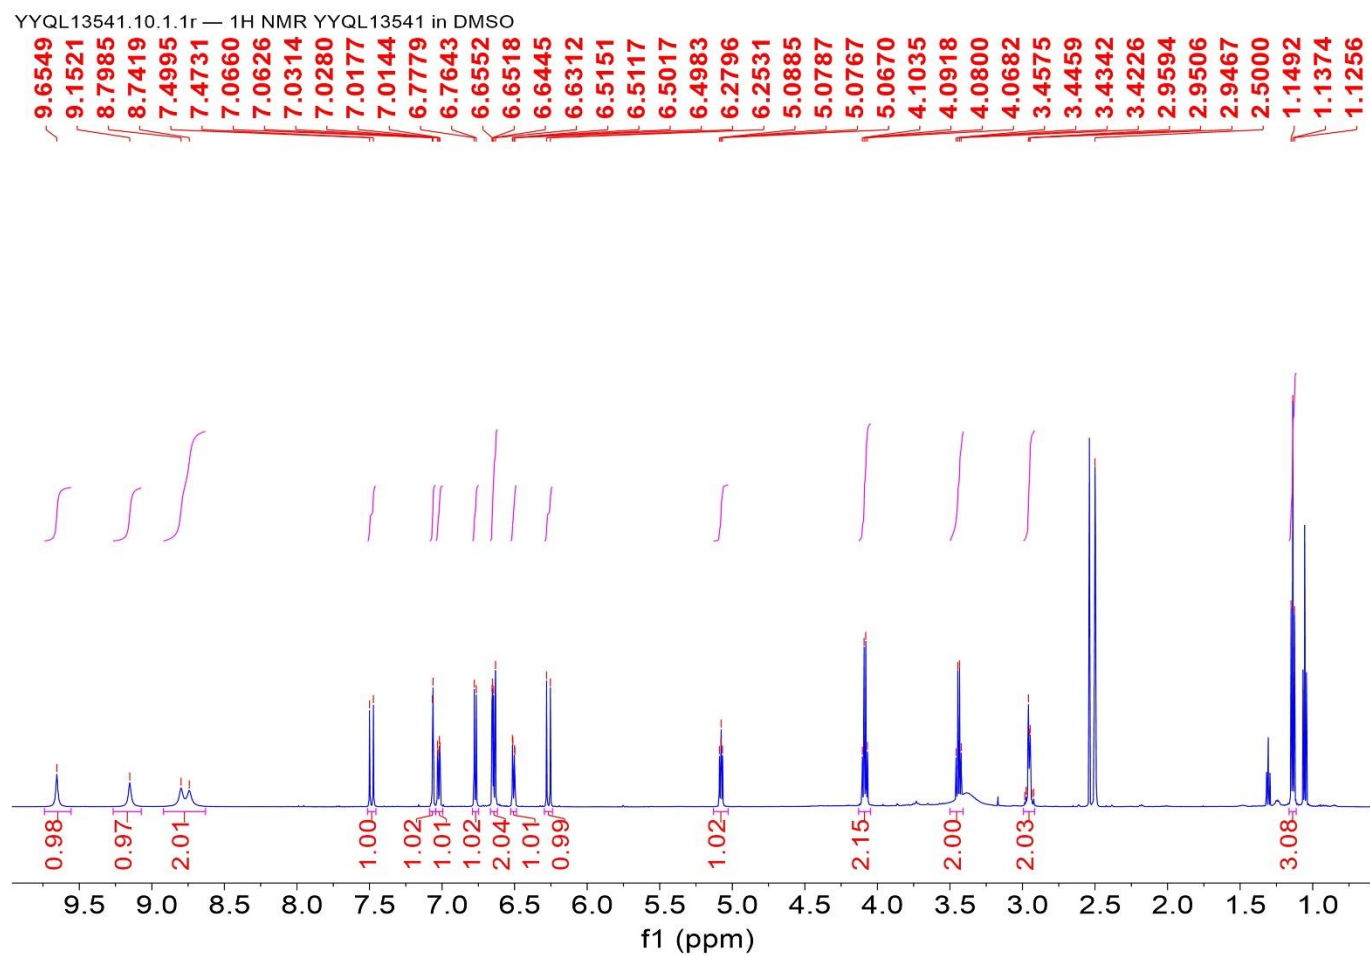

Figure S14.  $^1\text{H}$  NMR Spectrum (600 MHz) of ethyl rosmarinate (Fr1-3-5-4-1) (in  $\text{DMSO-}d_6$ )



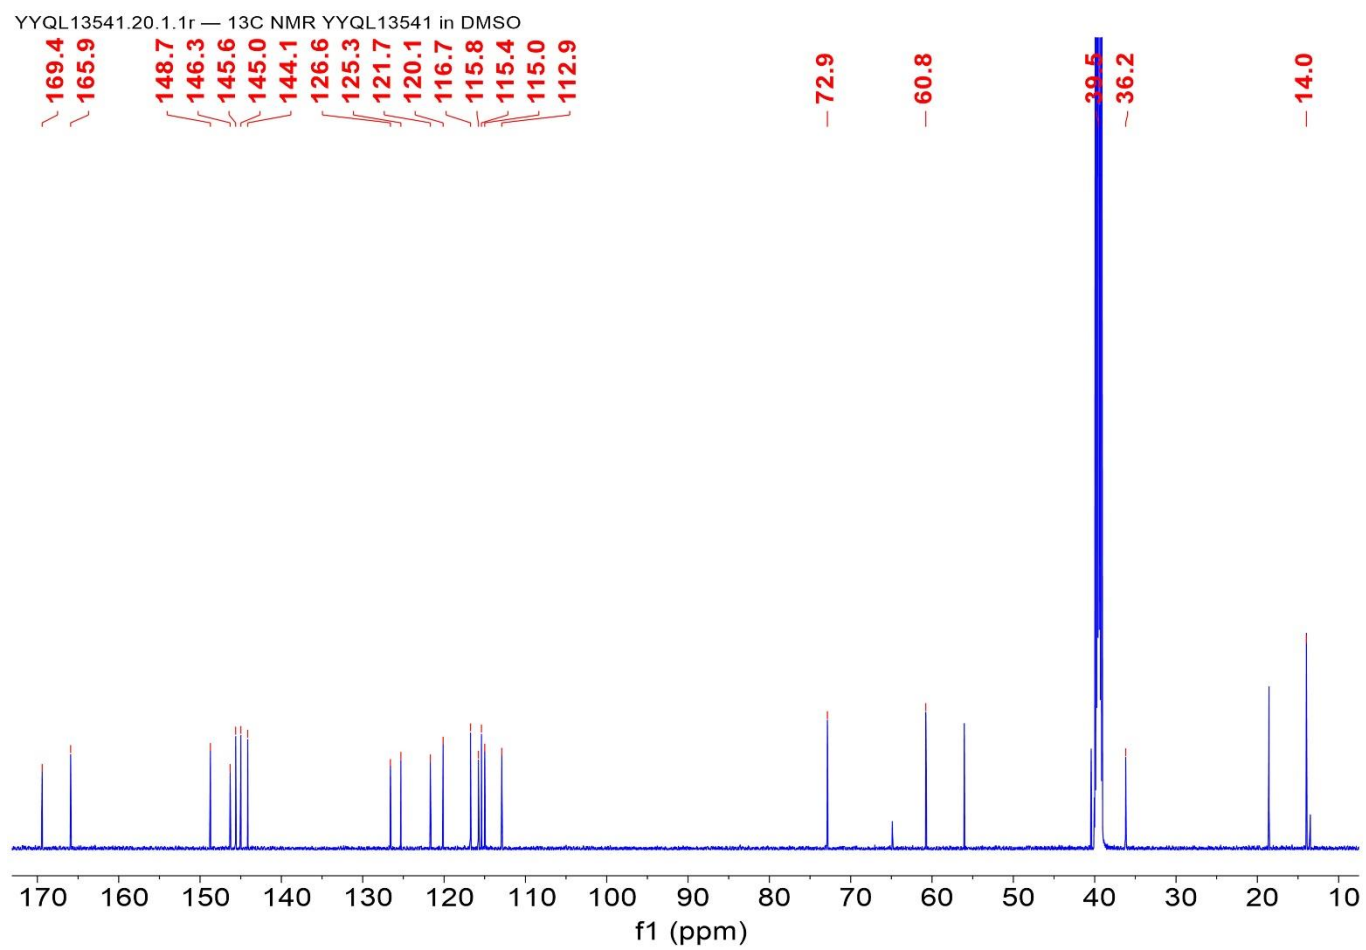

Figure S15.  $^{13}\text{C}$  NMR Spectrum (151 MHz) of ethyl rosmarinate (Fr1-3-5-4-1) (in  $\text{DMSO-}d_6$ )
